# Supplementary material
Source: publisher figshare collection journal article supplement (https://plos.figshare.com/articles/dataset/_/3902913)
Supplement: Supplementary file 1 [file 1]

Archive with 16 entries (16 files):
- S1 Table.XLSX
- S2 Table.XLSX
- S3 Table.XLSX
- S4 Table.XLSX
- S5 Table.XLSX
- S6 Table.XLSX
- S7 Table.XLSX
- S8 Table.XLSX
- S9 Table.XLSX
- S10 Table.XLSX
- S11 Table.XLSX
- S12 Table.XLSX
- S1 Fig.PDF
- S2 Fig.PDF
- S3 Fig.PDF
- S4 Fig.PDF
