# Supplementary material
Source: publisher figshare collection journal article supplement (https://plos.figshare.com/articles/dataset/_/3902913)
Supplement: Supplementary file 1 [file 1 › S1 Table.XLSX]

## Sheet: Sheet1
RefSeq ID	Strain name	Composition (Percentage)	Genome Size (MB)	Coverage (X)	Num. reads
NC_011138	Alteromonas macleodii str. 'Deep ecotype'	1.2	4.5	1.25	47907
NC_013771	Candidatus Atelocyanobacterium thalassa isolate ALOHA	3.6	1.4	3.75	41162
NC_015380	Candidatus Pelagibacter sp. IMCC9063	9.6	1.3	10	108297
NC_007205	Candidatus Pelagibacter ubique HTCC1062	9.6	1.3	10	113105
NC_007722	Erythrobacter litoralis HTCC2594	1.2	3	1.25	34089
NC_014472	Maribacter sp. HTCC2170	6	3.9	6.25	207081
NC_007484	Nitrosococcus oceani ATCC 19707	3.6	3.5	3.75	112436
NC_006370	Photobacterium profundum SS9 chromosome I	1.2	4.1	1.25	43020
NC_006371	Photobacterium profundum SS9 chromosome II	1.2	2.2	1.25	23377
NC_008816	Prochlorococcus marinus str. AS9601	7.2	1.7	7.5	101879
NC_009091	Prochlorococcus marinus str. MIT 9301	7.2	1.6	7.5	100271
NC_007577	Prochlorococcus marinus str. MIT 9312	7.2	1.7	7.5	103163
NC_005071	Prochlorococcus marinus str. MIT 9313	7.2	2.4	7.5	151514
NC_008817	Prochlorococcus marinus str. MIT 9515	7.2	1.7	7.5	101829
NC_008209	Roseobacter denitrificans Och 114	1.2	4.1	1.25	46918
NC_009052	Shewanella baltica OS155	1.2	5.1	1.25	54645
NC_007954	Shewanella denitrificans OS217	1.2	4.5	1.25	48235
NC_006576	Synechococcus elongatus PCC 6301	3.6	2.7	3.75	88350
NC_008319	Synechococcus sp. CC9311	3.6	2.6	3.75	83994
NC_007516	Synechococcus sp. CC9605	3.6	2.5	3.75	80670
NC_009482	Synechococcus sp. RCC307	3.6	2.2	3.75	72933
NC_005070	Synechococcus sp. WH8102	3.6	2.4	3.75	79010
NC_011184	Vibrio fischeri MJ11 chromosome I	1.2	2.9	1.25	31007
NC_011186	Vibrio fischeri MJ11 chromosome II	1.2	1.4	1.25	14990
NC_009783	Vibrio harveyi ATCC BAA-1116 chromosome I	1.2	3.8	1.25	41004
NC_009784	Vibrio harveyi ATCC BAA-1116 chromosome II	1.2	2.2	1.25	24123
