# Supplementary material
Source: publisher figshare collection journal article supplement (https://plos.figshare.com/articles/dataset/_/3902913)
Supplement: Supplementary file 1 [file 1 › S2 Table.XLSX]

## Sheet: Sheet1
KO00010	KO00020	KO00030	KO00051	KO00620	KO00680	KO00910	KO00920
PF00037	PF00037	PF00156	PF00004	PF00037	PF00005	PF00070	PF00107
PF00044	PF00056	PF00215	PF00005	PF00056	PF00037	PF00120	PF00132
PF00113	PF00096	PF00294	PF00006	PF00096	PF00056	PF00148	PF00156
PF00121	PF00118	PF00456	PF00037	PF00118	PF00113	PF00163	PF00291
PF00162	PF00166	PF00676	PF00107	PF00166	PF00155	PF00208	PF06426
PF00294	PF00180	PF00834	PF00121	PF00364	PF00265	PF00411	PF13561
PF00300	PF00364	PF00923	PF00132	PF00391	PF00266	PF00416	PF14602
PF00370	PF00529	PF01380	PF00290	PF00501	PF00270	PF00444
PF00480	PF00675	PF01918	PF00291	PF00529	PF00294	PF00557
PF00501	PF00682	PF01950	PF00294	PF00675	PF00300	PF00572
PF00722	PF00708	PF02502	PF00448	PF00682	PF00384	PF00575
PF01112	PF00814	PF02581	PF00483	PF00708	PF00389	PF00717
PF01380	PF01155	PF02779	PF00485	PF00814	PF00391	PF00890
PF01408	PF01210	PF02780	PF00596	PF01155	PF00437	PF01000
PF01558	PF01300	PF06013	PF00892	PF01210	PF00448	PF01134
PF01676	PF01363	PF08543	PF00931	PF01300	PF00464	PF01176
PF01855	PF01558	PF10432	PF00977	PF01326	PF00501	PF01193
PF01950	PF01597	PF13292	PF01027	PF01363	PF00749	PF01196
PF02685	PF01702	PF13793	PF01047	PF01558	PF00910	PF01262
PF02775	PF01855	PF14272	PF01078	PF01597	PF00931	PF01266
PF02780	PF02056	PF14572	PF01325	PF01702	PF01041	PF01416
PF02800	PF02254		PF01380	PF01855	PF01053	PF01479
PF03952	PF02436		PF01494	PF02056	PF01210	PF01488
PF06013	PF02492		PF01656	PF02254	PF01212	PF01494
PF07476	PF02543		PF01695	PF02436	PF01326	PF01593
PF08543	PF02737		PF01726	PF02492	PF01388	PF01946
PF09347	PF02775		PF01884	PF02543	PF01478	PF02558
PF09741	PF02780		PF01950	PF02737	PF01558	PF02826
PF10143	PF02866		PF01978	PF02775	PF01568	PF03118
PF10432	PF03446		PF02082	PF02780	PF01580	PF03486
PF12797	PF03721		PF02367	PF02866	PF01637	PF03721
PF12798	PF03807		PF02463	PF02896	PF01676	PF03807
PF12800	PF04481		PF02502	PF03446	PF01750	PF03951
PF12837	PF05193		PF02511	PF03721	PF01842	PF05833
PF12838	PF05681		PF02562	PF03807	PF01855	PF07992
PF13183	PF05683		PF03169	PF04055	PF01926	PF09954
PF13187	PF05896		PF03193	PF04481	PF01935	PF10662
PF13193	PF07503		PF03205	PF05193	PF01950	PF12396
PF13237	PF07649		PF03437	PF05681	PF02056	PF12831
PF13292	PF09723		PF03564	PF05683	PF02254	PF13187
PF13370	PF09891		PF03596	PF05896	PF02463	PF13241
PF13378	PF10571		PF03631	PF06451	PF02492	PF13275
PF13484	PF11104		PF03729	PF07503	PF02562	PF13434
PF13534	PF12700		PF03739	PF07649	PF02737	PF13450
PF13580	PF12797		PF03741	PF08502	PF02742	PF13454
PF13746	PF12798		PF03965	PF08726	PF02775	PF13738
PF14697	PF12800		PF05116	PF09723	PF02780	PF14444
	PF12837		PF05729	PF09741	PF02826	PF14520
	PF12838		PF06013	PF09891	PF02866	PF14691
	PF13183		PF06193	PF10571	PF02896
	PF13187		PF06414	PF11104	PF03029
	PF13237		PF06738	PF12700	PF03205
	PF13292		PF07728	PF12797	PF03266
	PF13370		PF07907	PF12798	PF03308
	PF13375		PF08240	PF12800	PF03446
	PF13437		PF08282	PF12837	PF03461
	PF13484		PF08352	PF12838	PF03599
	PF13533		PF08477	PF13183	PF03721
	PF13534		PF08543	PF13187	PF03807
	PF13717		PF09488	PF13193	PF03952
	PF13719		PF09678	PF13237	PF04055
	PF13738		PF09906	PF13292	PF04060
	PF13746		PF10156	PF13370	PF04879
	PF13805		PF10432	PF13375	PF04917
	PF13894		PF10518	PF13437	PF05116
	PF13912		PF10662	PF13484	PF05729
	PF14311		PF11139	PF13533	PF06271
	PF14446		PF11143	PF13534	PF06414
	PF14697		PF12710	PF13714	PF06451
			PF12793	PF13717	PF06750
			PF12797	PF13719	PF07476
			PF12800	PF13738	PF07963
			PF12802	PF13746	PF07991
			PF12804	PF13805	PF08282
			PF12837	PF13894	PF08433
			PF12838	PF13912	PF08543
			PF12840	PF14174	PF09488
			PF12846	PF14311	PF09741
			PF13183	PF14446	PF10143
			PF13187	PF14697	PF10236
			PF13191		PF10412
			PF13207		PF10443
			PF13237		PF10518
			PF13238		PF11602
			PF13245		PF12675
			PF13304		PF12710
			PF13344		PF12797
			PF13346		PF12798
			PF13401		PF12800
			PF13412		PF12837
			PF13463		PF12838
			PF13476		PF12846
			PF13481		PF13086
			PF13484		PF13173
			PF13486		PF13183
			PF13520		PF13187
			PF13534		PF13191
			PF13545		PF13193
			PF13555		PF13207
			PF13601		PF13237
			PF13604		PF13238
			PF13614		PF13245
			PF13671		PF13247
			PF13886		PF13292
			PF13936		PF13344
			PF14150		PF13353
			PF14272		PF13370
			PF14602		PF13378
			PF14667		PF13394
			PF14691		PF13401
			PF14697		PF13459
					PF13476
					PF13481
					PF13484
					PF13534
					PF13544
					PF13555
					PF13604
					PF13633
					PF13671
					PF13738
					PF13746
					PF14691
					PF14697
