# Supplementary material
Source: publisher figshare collection journal article supplement (https://plos.figshare.com/articles/dataset/_/3902913)
Supplement: Supplementary file 1 [file 1 › S3 Fig.PDF]

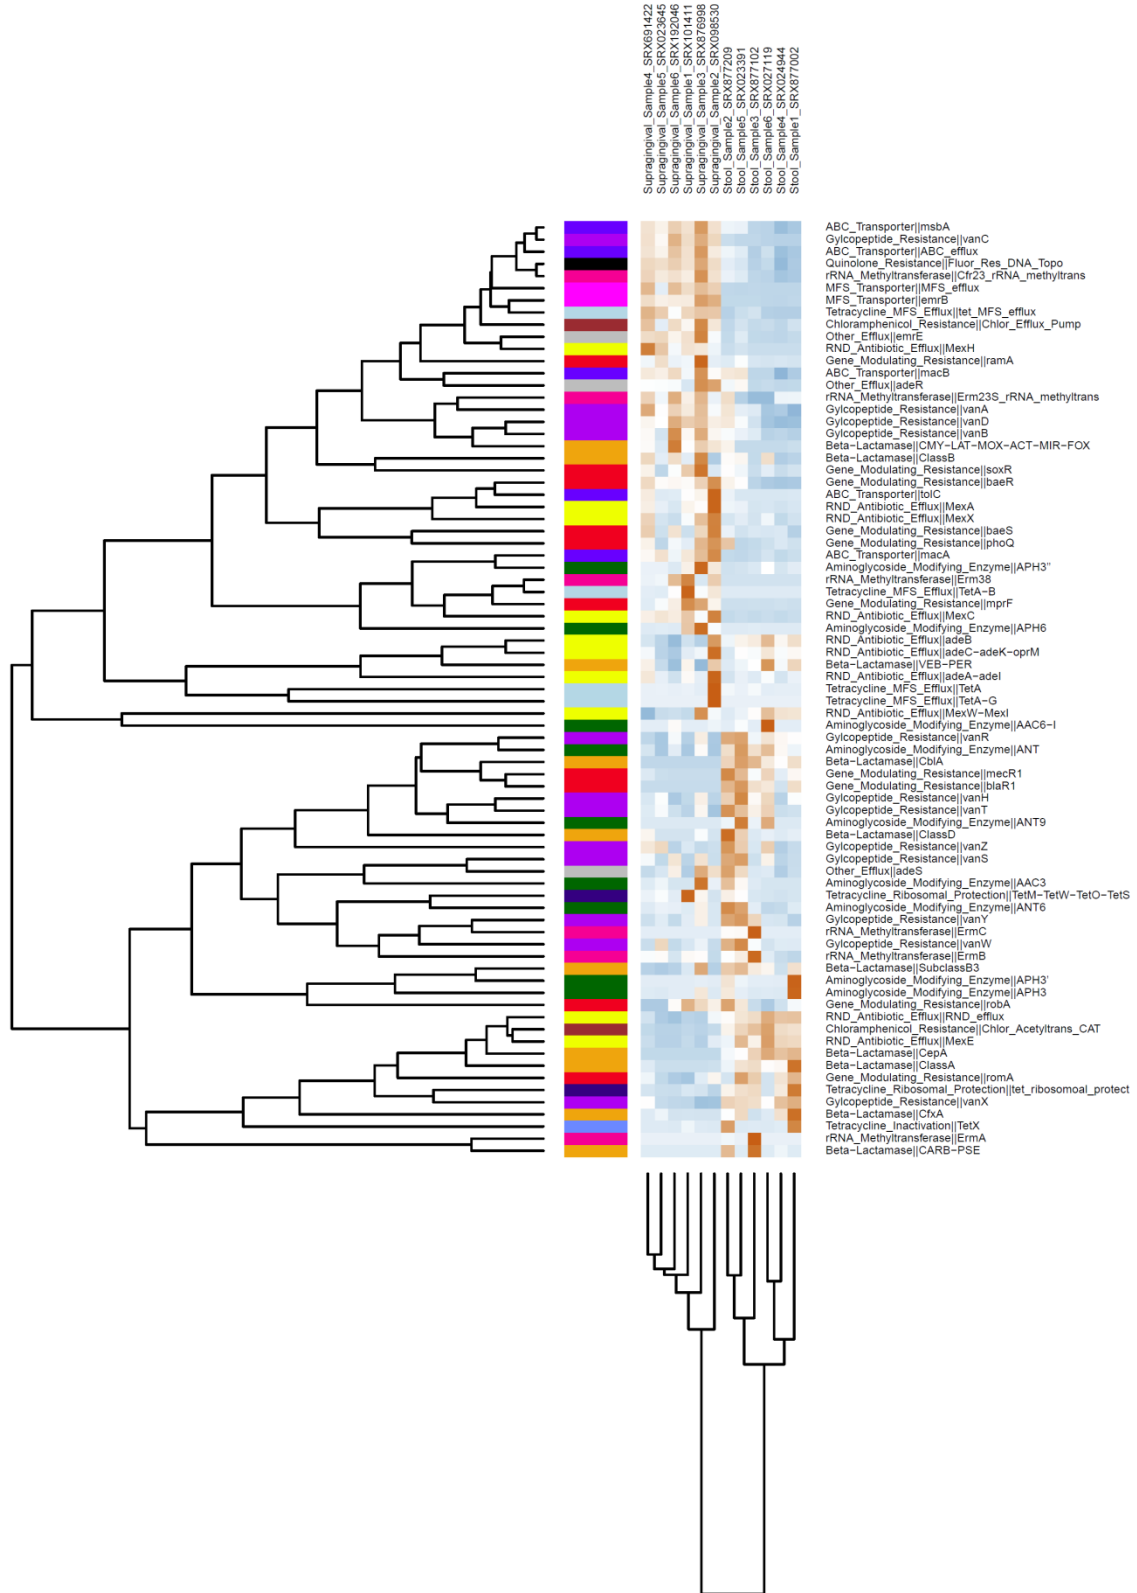

**Figure S3:** The two-dimensional hierarchical clustering results generated by using the HMMER3-predicted AMR families abundance profiles for the human supragingival and stool data sets.
