# Supplementary material
Source: publisher figshare collection journal article supplement (https://plos.figshare.com/articles/dataset/_/3902913)
Supplement: Supplementary file 1 [file 1 › S3 Table.XLSX]

## Sheet: Sheet1
Pathway	#Families	HMM-GRASPx			HMMER3			RPS-BLAST			UProC
		Rec.	Pre.	F.	Rec.	Pre.	F.	Rec.	Pre.	F.	Rec.	Pre.	F.
KO00010	47	83.8	94.8	89	24.1	95.6	38.6	42.2	97.6	58.9	27.5	66.6	38.9
KO00020	69	70.4	86.5	77.6	17.9	90.1	30	30.7	93.5	46.2	28.7	71.8	41.1
KO00030	21	89.2	96.4	92.7	28.1	98.5	43.7	47.5	97.2	64	34.3	57.8	43
KO00051	111	71.3	88.6	79	15.4	94	26.4	23.9	90.8	37.9	17.8	62.8	27.8
KO00620	80	72.6	90.4	80.6	15.6	92.3	26.7	27.4	94.6	42.4	24.6	75.3	37.1
KO00680	124	73.1	91.5	81.3	17.3	95.1	29.3	28.1	92.9	43.2	22.6	78.8	35.2
KO00910	49	72	87.2	79	16.7	92	28.2	30	88.2	44.6	27.8	73.1	40.3
KO00920	7	72.6	91.5	81	10.5	92.4	18.9	22.8	95.8	36.9	9.2	23.8	13.2
Average	-	75.6	90.9	82.5	18.2	93.8	30.2	31.6	93.8	46.8	24.1	63.8	34.6
