# Supplementary material
Source: publisher figshare collection journal article supplement (https://plos.figshare.com/articles/dataset/_/3902913)
Supplement: Supplementary file 1 [file 1 › S4 Table.XLSX]

## Sheet: Sheet1
Pathway	#Families	HMM-GRASPx		Hmmer3		RPS-BLAST		UProC
		CPU	Wall (16)	CPU	Wall (16)	CPU	Wall*	CPU	Wall (16)
KO00010	47	0h58m	0h16m	0h2m	0h1m	8h45m	8h54m	0h2m	0m46s
KO00020	69	1h11m	0h7m	0h4m	0h2m	9h5m	10h10m	0h2m	0m40s
KO00030	21	0h33m	0h6m	0h1m	0m28s	5h58m	6h4m	0h2m	0m34s
KO00051	111	2h16m	0h11m	0h6m	0h2m	13h40m	14h53m	0h2m	0m14s
KO00620	80	1h22m	0h7m	0h4m	0h2m	8h55m	9h58m	0h2m	0m40s
KO00680	124	3h8m	0h13m	0h7m	0h3m	12h29m	13h1m	0h2m	0h1m
KO00910	49	1h14m	0h7m	0h3m	0h1m	10h4m	11h31m	0h2m	0m45s
KO00920	7	0h6m	0h3m	0m27s	0m9s	1h44m	1h46m	0h2m	0m35
*RPS-BLAST was run with a single-threaded mode
