# Supplementary material
Source: publisher figshare collection journal article supplement (https://plos.figshare.com/articles/dataset/_/3902913)
Supplement: Supplementary file 1 [file 1 › S5 Table.XLSX]

## Sheet: Sheet1
Bacteriocin	Butyrolactones	Homoserine lactone	Lantipeptides	NRPS	Oligosaccharide	PKS	Terpene	Thiopeptide
PF08109	PF03756	PF00765	PF05147	PF00668	PF00534	PF00195	PF03936	PF02624
PF10439			PF04737	PF00501	PF00535		PF01397
PF09221			PF04738	PF00550	PF03033		PF05834
PF12173			PF08130
PF01721			PF02052
PF11758			PF04604
PF04369
PF08129
PF09683
PF11632
PF11420
PF03515
PF04454
