# Supplementary material
Source: publisher figshare collection journal article supplement (https://plos.figshare.com/articles/dataset/_/3902913)
Supplement: Supplementary file 1 [file 1 › S6 Table.XLSX]

## Sheet: Sheet1
Name	#Pfams	HMMER3
		#t.r.	#t.c.
Bacteriocin	13	63	15
B. Lactone	1	0	0
H. Lactone	1	0	0
Lanti pep.	6	7	5
NRPS	3	1942	281
Oligo sac.	3	5031	739
PKS	1	0	0
Terpene	3	3	2
Thiopeptide	1	75	12
