# Supplementary material
Source: publisher figshare collection journal article supplement (https://plos.figshare.com/articles/dataset/_/3902913)
Supplement: Supplementary file 1 [file 1 › S7 Table.XLSX]

## Sheet: Sheet1
Name	#Pfams	HMM-GRASPx	RPS-BLAST	UProC	HMMER3
Bacteriocin	13	50	33	26	37
B. Lactone	1	53	33	24	N/A
H. Lactone	1	65	35	24	N/A
Lanti pep.	6	124	34	32	32
NRPS	3	102	50	32	44
Oligo sac.	3	117	53	32	46
PKS	1	126	35	24	33
Terpene	3	48	37	32	34
Thiopeptide	1	212	40	24	45
“N/A” indicates that no peptide contig was assembled by using the corresponding program’s predictions. The highest performances among all programs are in bold.
