# Supplementary material
Source: publisher figshare collection journal article supplement (https://plos.figshare.com/articles/dataset/_/3902913)
Supplement: Supplementary file 1 [file 1 › S8 Table.XLSX]

## Sheet: Sheet1
Pathway	#Families	HMM-GRASPx		HMMER3		RPS-BLAST		UProC
		CPU	Wall	CPU	Wall	CPU	Wall	CPU	Wall
Bacteriocin	13	0h24m	0h26m	0h3m	0h3m	9h52m	12h49m	0h5m	0h5m
B. Lactone	1	0h5m	0h5m	0m15s	0m16s	3h25m	3h28m	0h4m	0h4m
H. Lactone	1	0h7m	0h7m	0m13s	0m14s	4h59m	5h3m	0h4m	0h4m
Lanti pep.	6	0h28m	0h29m	0h2m	0h2m	13h59m	17h2m	0h5m	0h5m
NRPS	3	0h23m	0h23m	0h1m	0h1m	12h0m	12h13m	0h5m	0h6m
Oligo sac.	3	0h11m	0h11m	0h1m	0h1m	6h22m	6h27m	0h6m	0h6m
PKS	1	0h10m	0h11m	0m18s	0m18s	5h41m	5h46m	0h4m	0h5m
Terpene	3	0h24m	0h24m	0h1m	0h1m	13h7m	13h49m	0h5m	0h6m
Thiopeptide	1	0h13m	0h13m	0m18s	0m18s	6h7m	6h16m	0h4m	0h5m
*All programs use single CPU
