# Supplementary material
Source: publisher figshare collection journal article supplement (https://plos.figshare.com/articles/dataset/_/3902913)
Supplement: Supplementary file 1 [file 1 › S9 Table.XLSX]

## Sheet: Sheet1
RESFAM Searched	RESFAM high abundance		*high abudnance means that the family has at least 10 homolog reads being detected, by either HMM-GRASPx or HMMER3
RF0001	RF0002
RF0002	RF0004
RF0003	RF0007
RF0004	RF0029
RF0005	RF0030
RF0006	RF0166
RF0007	RF0172
RF0019	RF0173
RF0020	RF0033
RF0021	RF0034
RF0022	RF0044
RF0023	RF0057
RF0026	RF0046
RF0027	RF0047
RF0028	RF0048
RF0029	RF0049
RF0030	RF0050
RF0033	RF0051
RF0034	RF0053
RF0035	RF0054
RF0036	RF0056
RF0037	RF0067
RF0040	RF0068
RF0041	RF0069
RF0042	RF0070
RF0043	RF0071
RF0044	RF0074
RF0046	RF0104
RF0047	RF0096
RF0048	RF0097
RF0049	RF0098
RF0050	RF0099
RF0051	RF0100
RF0052	RF0101
RF0053	RF0115
RF0054	RF0125
RF0055	RF0128
RF0056	RF0129
RF0057	RF0127
RF0059	RF0133
RF0062	RF0136
RF0064	RF0161
RF0065	RF0019
RF0066	RF0020
RF0067	RF0021
RF0068	RF0022
RF0069	RF0023
RF0070	RF0035
RF0071	RF0036
RF0072	RF0043
RF0074	RF0065
RF0076	RF0066
RF0078	RF0088
RF0080	RF0089
RF0081	RF0094
RF0082	RF0106
RF0083	RF0107
RF0084	RF0112
RF0087	RF0114
RF0088	RF0116
RF0089	RF0117
RF0090	RF0121
RF0091	RF0134
RF0094	RF0135
RF0096	RF0147
RF0097	RF0149
RF0098	RF0150
RF0099	RF0151
RF0100	RF0152
RF0101	RF0153
RF0104	RF0154
RF0105	RF0155
RF0106	RF0156
RF0107	RF0157
RF0108	RF0158
RF0109	RF0159
RF0111	RF0160
RF0112
RF0113
RF0114
RF0115
RF0116
RF0117
RF0118
RF0119
RF0120
RF0121
RF0122
RF0123
RF0124
RF0125
RF0126
RF0127
RF0128
RF0129
RF0130
RF0131
RF0132
RF0133
RF0134
RF0135
RF0136
RF0137
RF0147
RF0149
RF0150
RF0151
RF0152
RF0153
RF0154
RF0155
RF0156
RF0157
RF0158
RF0159
RF0160
RF0161
RF0162
RF0166
RF0174
RF0172
RF0173
RF0168
