# Supplementary material
Source: publisher figshare collection journal article supplement (https://plos.figshare.com/articles/dataset/_/3902913)
Supplement: Supplementary file 1 [file 1 › S10 Table.XLSX]

## Sheet: Sheet1
Subject ID	Accession (Supragingival)	Accession (Stool)
241743	SRX098530	SRX877209
241760	SRX691422	SRX024944
241771	SRX876998	SRX877102
241778	SRX101411	SRX877002
241817	SRX023645	SRX023391
257122	SRX192046	SRX027119
