# Supplementary material
Source: publisher figshare collection journal article supplement (https://plos.figshare.com/articles/dataset/_/3902913)
Supplement: Supplementary file 1 [file 1 › S11 Table.XLSX]

## Sheet: Sheet1
SRA_ID	Time_point	Sample_name	Percentage_mapped_to_14_genomes
SRX739395	0H1	pair_mRNA_pH_7_Rep_1	0.656237
SRX745225	0H2	pair_mRNA_pH_7_Rep_2	0.649605
SRX748266	0H3	pair_mRNA_pH_7_Rep_3	0.659422
SRX748253	6H2	pair_mRNA_pH_4.2_Rep_2	0.751414
SRX748263	6H3	pair_mRNA_pH_4.2_Rep_3	0.675256
SRX748267	9H1	pair_mRNA_pH_5.2_Rep_1	0.641732
SRX748860	9H2	pair_mRNA_pH_5.2_Rep_2	0.693257
SRX748861	9H3	pair_mRNA_pH_5.2_Rep_3	0.659903
