# Supplementary material
Source: publisher figshare collection journal article supplement (https://plos.figshare.com/articles/dataset/_/3902913)
Supplement: Supplementary file 1 [file 1 › S12 Table.XLSX]

## Sheet: Sheet1
antiSMASH2.0 families used for differential expression	antiSMASH2.0 families used for targeted assembly (profile length >200)	Profile length of families used for targeted assembly
AMP-binding	AMP-binding	417
Antimicrobial14	A-OX	780
Antimicrobial17	bacilysin	472
Antimicrobial18	bcpB	313
Autoind_synth	BLS	439
BacteriocIIc_cy	botH	249
Bacteriocin_IIc	bt1fas	372
Bacteriocin_IId	CaiA	393
Bacteriocin_II	CAS	325
Bacteriocin_IIi	Chal_sti_synt_N	227
Chal_sti_synt_N	Cloacin	297
Cloacin	Condensation	301
Condensation	cyanobactin_synth	449
A-OX	cycdipepsynth	241
ATd	dmat	407
bacilysin	DOIS	355
bcpB	fabH	314
BLS	fom1	435
botH	frbD	276
bt1fas	ft1fas	458
CaiA	fung_ggpp	270
CAS	fung_ggpp2	267
cyanobactin_synth	goadsporin_like	515
cycdipepsynth	hgld	396
cypemycin	hgle	404
cypI	indsynth	1035
dmat	IucA_IucC	252
DOIS	LANC_like	355
ectoine_synt	Lant_dehyd_C	500
fabH	lasso	533
fom1	Linocin_M18	255
frbD	LipM	233
ft1fas	LipU	600
fung_ggpp2	LipV	341
fung_ggpp	LmbU	208
glycocin	Lycopene_cycl	374
goadsporin_like	mcjC	513
hgld	MGT	379
hgle	MGT2	379
indsynth	mitE	707
lasso	mmyO	373
LipM	moeGT	239
LipU	MoeO5	263
LipV	NapT7	350
LmbU	neoL_like	421
mcjC	nikJ	455
melC	nikO	473
MGT2	novH	600
MGT	novI	407
micJ25	novJ	258
mitE	novK	242
mmyO	phosphonates	284
moeGT	phytoene_synth	269
MoeO5	prnB	361
mvd	pur10	361
mvnA	pur6	772
NapT7	salQ	408
neoL_like	skfc	496
nikJ	spcDK_like_cou	296
nikO	spcDK_like_glyc	303
novH	spcFG_like	230
novI	strH_like	385
novJ	strK_like1	459
novK	strK_like2	466
phosphonates	subtilosin	448
phytoene_synth	t2clf	397
phzB	t2fas	409
prnB	t2ks	420
pur10	t2ks2	413
pur6	tabtoxin	621
salQ	terpene_cyclase	237
skfc	Terpene_synth_C	270
spcDK_like_cou	TIGR03603	319
spcDK_like_glyc	TIGR03604	377
spcFG_like	TIGR03693	637
strepbact	TIGR03975	606
strep_PEQAXS	trichodiene_synt	377
strH_like	TunD	321
strK_like1	valA_like	346
strK_like2	vlmB	325
sublancin	YcaO	332
subtilosin
t2clf
t2fas
t2ks2
t2ks
tabtoxin
terpene_cyclase
thiostrepton
thuricin
ToyB
trichodiene_synt
TunD
valA_like
vlmB
Gallidermin
Glycos_transf_1
Glycos_transf_2
Glyco_transf_28
IucA_IucC
Lactococcin_972
Lactococcin
LANC_like
Lant_dehyd_C
Lant_dehyd_N
L_biotic_typeA
LcnG-beta
Linocin_M18
Lycopene_cycl
PP-binding
Subtilosin_A
Terpene_synth_C
Terpene_synth
TIGR03601
TIGR03602
TIGR03603
TIGR03604
TIGR03605
TIGR03651
TIGR03678
TIGR03693
TIGR03731
TIGR03793
TIGR03795
TIGR03798
TIGR03882
TIGR03975
TIGR04363
YcaO
